# Supplementary material for: Role of the Genes of Type VI Secretion System in Virulence of Rice Bacterial Brown Stripe Pathogen Acidovorax avenae subsp. avenae Strain RS-2
Source: PubMed Central journal article supplement (PMC5666706; doi:10.3390/ijms18102024), 2017-09-21
Supplement: ijms-18-02024-s001.pdf [file ijms-18-02024-s001.pdf]

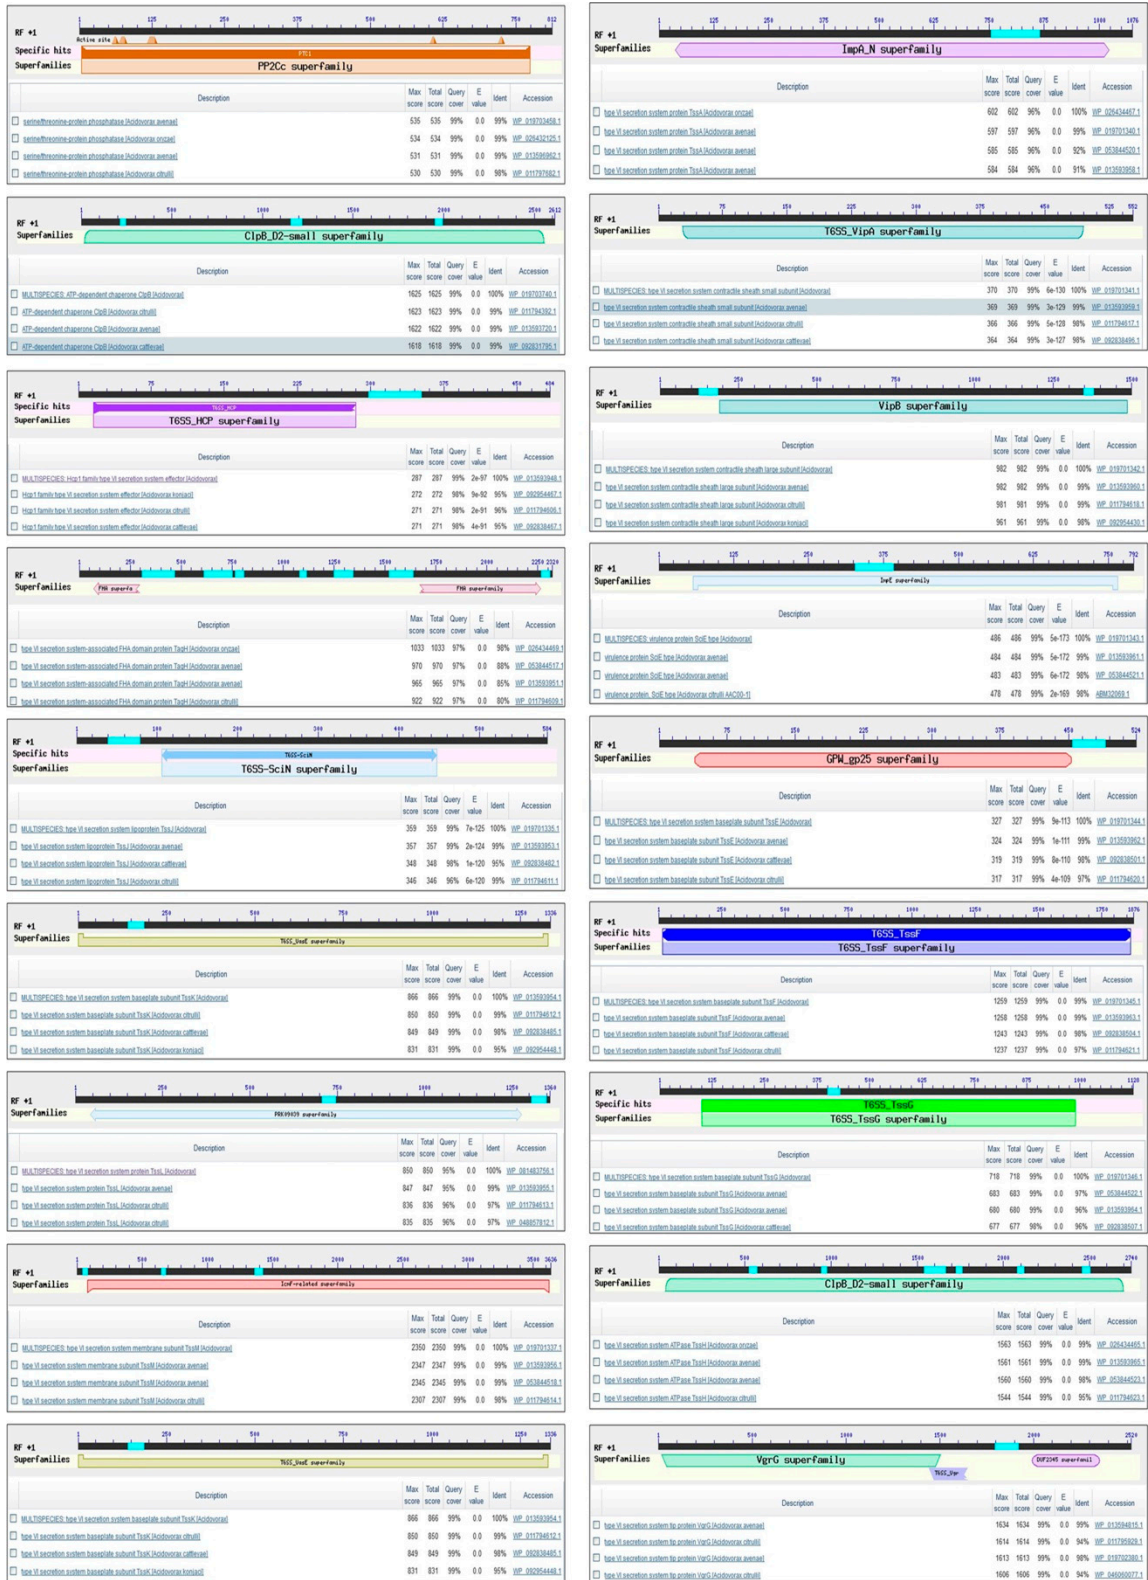

**Figure S1.** BLASTX images, generated in NCBI databases, showing the presence of T6SS putative proteins in *Acidovorax avenae* subsp. *avenae* strain RS-2, which were homologs in closely related bacteria such as *A. avenae* subsp. *avenae* ATCC 19860 and *Acidovorax citrulli* AAC00-1. Note: Similar results were found for vgrG 1-8 due to high sequence similarity. Here only show one verG result as an example.

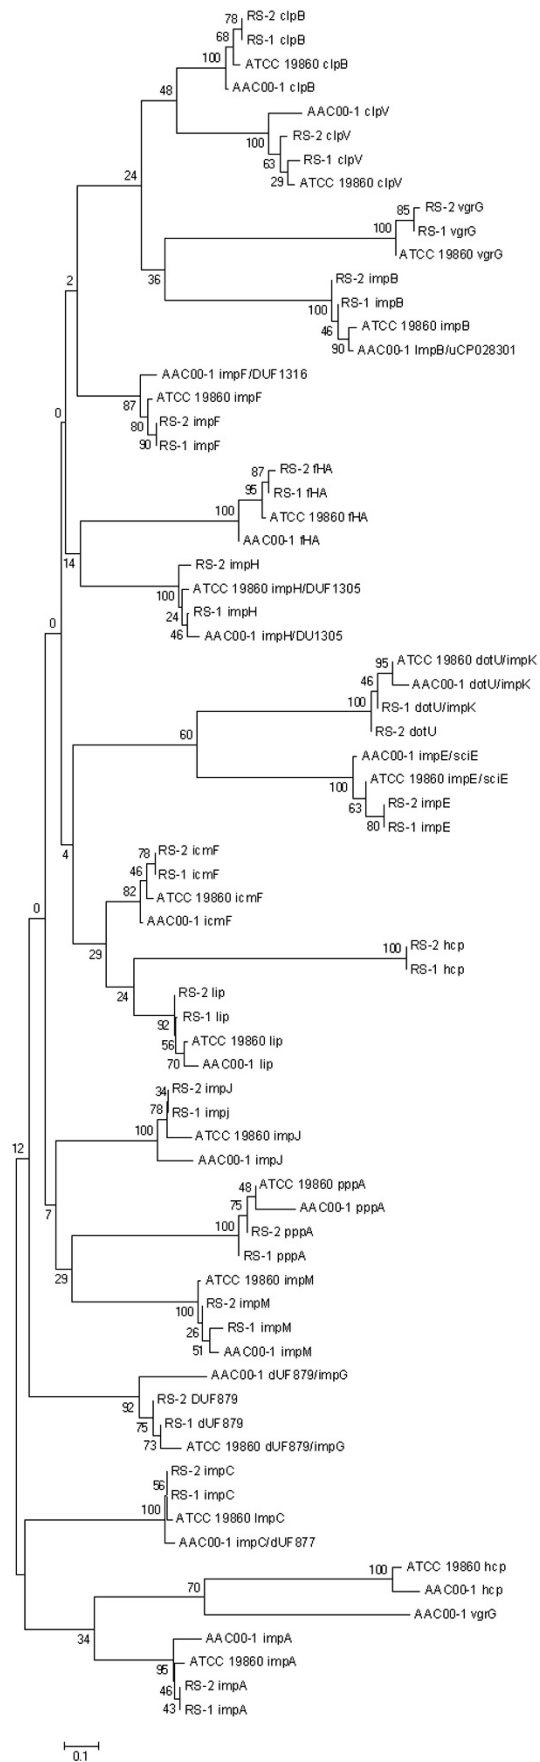

**Figure S2.** Phylogenetic tree, generated by the neighbour-joining method using T6SS gene sequences of bacteria from *Acidovorax avenae* subsp. *avenae* strain RS-1, RS-2, and ATCC 19860; *Acidovorax citrulli* AAC00-1, showing the homologs of T6SS among the members of the genus *Acidovorax*. The two-parameter Kimura correction of evolutionary distances was used. Bootstrap analysis (1000 replicates) for node values greater than 50% are given. Bar 0.1 substitutions per nucleotide position.

**Table S1** *In silico* predictions of type VI secretion system genes in *Acidovorax avenae* subsp. *avenae* strain RS-2 genome and their sequence homologies with that of strain RS-1, and ATCC 19860 of *Aaa*, as well as strain AAC00-1 of *Acidovorax citrulli*.

| <b>T6SS genes</b> | <b>Locus Tag</b> | <b>Putative Functions</b>                   |
|-------------------|------------------|---------------------------------------------|
| <i>pppA</i>       | Acav_4620        | protein serine/threonine phosphatase        |
| <i>clpB</i>       | Acav_1267        | ATP-dependent chaperone                     |
| <i>hcp</i>        | Acav_1504        | hypothetical protein                        |
| <i>fHA</i>        | Acav_1507        | FHA domain-containing protein               |
| <i>lip</i>        | Acav_1509        | type VI secretion lipoprotein               |
| <i>impJ</i>       | Acav_1510        | type VI secretion protein                   |
| <i>dotU</i>       | Acav_1511        | type VI secretion protein                   |
| <i>icmF</i>       | Acav_1512        | type VI secretion protein                   |
| <i>impM</i>       | Acav_1513        | type VI secretion system-associated protein |
| <i>impA</i>       | Acav_1514        | type VI secretion-associated protein        |
| <i>impB</i>       | Acav_1515        | type VI secretion protein                   |
| <i>impC</i>       | Acav_1516        | type VI secretion protein                   |
| <i>impE</i>       | Acav_1517        | type VI secretion protein                   |
| <i>impF</i>       | Acav_1518        | Lysozyme-like protein                       |
| <i>dUF879</i>     | Acav_1519        | type VI secretion protein                   |
| <i>impH</i>       | Acav_1520        | type VI secretion protein                   |
| <i>clpV</i>       | Acav_1521        | ATPase                                      |
| <i>vgrG-1</i>     | Acav_0298        | type VI secretion-associated protein        |
| <i>vgrG-2</i>     | Acav_0662        | type VI secretion-associated protein        |
| <i>vgrG-3</i>     | Acav_2399        | type VI secretion-associated protein        |
| <i>vgrG-4</i>     | Acav_3111        | type VI secretion-associated protein        |
| <i>vgrG-5</i>     | Acav_3369        | type VI secretion-associated protein        |
| <i>vgrG-6</i>     | Acav_3676        | type VI secretion-associated protein        |
| <i>vgrG-7</i>     | Acav_3724        | type VI secretion-associated protein        |
| <i>vgrG-8</i>     | Acav_1905        | type VI secretion-associated protein        |

**Table S2** Strains and plasmids used in this study.

| Strain or plasmid                                            | Relevant characteristics <sup>a</sup>                                                                                              | Sources or references |
|--------------------------------------------------------------|------------------------------------------------------------------------------------------------------------------------------------|-----------------------|
| <b><i>Acidovorax avenae</i> subsp. <i>avenae</i> strains</b> |                                                                                                                                    |                       |
| RS-2                                                         | Rif <sup>R</sup> ; The pathogen of bacterial brown stripe of rice, isolated from the diseased rice from Zhejiang province in China | Lab collection        |
| <i>ΔpppA</i>                                                 | Rif <sup>R</sup> , Kan <sup>R</sup> ; RS-2 in-frame deletion mutation defective in <i>pppA</i>                                     | This study            |
| <i>ΔpppA</i> -comp                                           | Rif <sup>R</sup> , Amp <sup>R</sup> , Kan <sup>R</sup> ; <i>ΔpppA</i> complemented with pRADK- <i>pppA</i>                         | This study            |
| <i>ΔclpB</i>                                                 | Rif <sup>R</sup> , Kan <sup>R</sup> ; RS-2 in-frame deletion mutation defective in <i>clpB</i>                                     | This study            |
| <i>ΔclpB</i> -comp                                           | Rif <sup>R</sup> , Amp <sup>R</sup> , Kan <sup>R</sup> ; <i>ΔclpB</i> complemented with pRADK- <i>clpB</i>                         | This study            |
| <i>Δhcp</i>                                                  | Rif <sup>R</sup> , Kan <sup>R</sup> ; RS-2 in-frame deletion mutation defective in <i>hcp</i>                                      | This study            |
| <i>Δhcp</i> -comp                                            | Rif <sup>R</sup> , Amp <sup>R</sup> , Kan <sup>R</sup> ; <i>Δhcp</i> complemented with with pRADK- <i>hcp</i>                      | This study            |
| <i>ΔfHA</i>                                                  | Rif <sup>R</sup> , Kan <sup>R</sup> ; RS-2 in-frame deletion mutation defective in <i>fHA</i>                                      | This study            |
| <i>Δlip</i>                                                  | Rif <sup>R</sup> , Kan <sup>R</sup> ; RS-2 in-frame deletion mutation defective in <i>lip</i>                                      | This study            |
| <i>ΔimpJ</i>                                                 | Rif <sup>R</sup> , Kan <sup>R</sup> ; RS-2 in-frame deletion mutation defective in <i>impJ</i>                                     | This study            |
| <i>ΔimpJ</i> -comp                                           | Rif <sup>R</sup> , Amp <sup>R</sup> , Kan <sup>R</sup> ; <i>ΔimpJ</i> complemented with pRADK- <i>impJ</i>                         | This study            |
| <i>ΔdotU</i>                                                 | Rif <sup>R</sup> , Kan <sup>R</sup> ; RS-2 in-frame deletion mutation defective in <i>dotU</i>                                     | This study            |
| <i>ΔdotU</i> -comp                                           | Rif <sup>R</sup> , Amp <sup>R</sup> , Kan <sup>R</sup> ; <i>ΔdotU</i> complemented with pRADK- <i>dotU</i>                         | This study            |
| <i>ΔicmF</i>                                                 | Rif <sup>R</sup> , Kan <sup>R</sup> ; RS-2 in-frame deletion mutation defective in <i>icmF</i>                                     | This study            |
| <i>ΔicmF</i> -comp                                           | Rif <sup>R</sup> , Amp <sup>R</sup> , Kan <sup>R</sup> ; <i>ΔicmF</i> complemented with pRADK- <i>icmF</i>                         | This study            |
| <i>ΔimpM</i>                                                 | Rif <sup>R</sup> , Kan <sup>R</sup> ; RS-2 in-frame deletion mutation defective in <i>impM</i>                                     | This study            |
| <i>ΔimpM</i> -comp                                           | Rif <sup>R</sup> , Amp <sup>R</sup> , Kan <sup>R</sup> ; <i>ΔimpM</i> complemented with pRADK- <i>impM</i>                         | This study            |
| <i>ΔimpA</i>                                                 | Rif <sup>R</sup> , Kan <sup>R</sup> ; RS-2 in-frame deletion mutation defective in <i>impA</i>                                     | This study            |
| <i>ΔimpB</i>                                                 | Rif <sup>R</sup> , Kan <sup>R</sup> ; RS-2 in-frame deletion mutation defective in <i>impB</i>                                     | This study            |
| <i>ΔimpC</i>                                                 | Rif <sup>R</sup> , Kan <sup>R</sup> ; RS-2 in-frame deletion mutation                                                              | This study            |

|                                        |                                                                                                                                                                  |                             |
|----------------------------------------|------------------------------------------------------------------------------------------------------------------------------------------------------------------|-----------------------------|
|                                        | defective in <i>impC</i>                                                                                                                                         |                             |
| <i>ΔimpE</i>                           | Rif <sup>R</sup> , Kan <sup>R</sup> ; RS-2 in-frame deletion mutation<br>defective in <i>impE</i>                                                                | This study                  |
| <i>ΔimpF</i>                           | Rif <sup>R</sup> , Kan <sup>R</sup> ; RS-2 in-frame deletion mutation<br>defective in <i>impF</i>                                                                | This study                  |
| <i>ΔdUF879</i>                         | Rif <sup>R</sup> , Kan <sup>R</sup> ; RS-2 in-frame deletion mutation<br>defective in <i>dUF879</i>                                                              | This study                  |
| <i>ΔimpH</i>                           | Rif <sup>R</sup> , Kan <sup>R</sup> ; RS-2 in-frame deletion mutation<br>defective in <i>impH</i>                                                                | This study                  |
| <i>ΔclpV</i>                           | Rif <sup>R</sup> , Kan <sup>R</sup> ; RS-2 in-frame deletion mutation<br>defective in <i>clpV</i>                                                                | This study                  |
| <i>ΔvgrG-1</i>                         | Rif <sup>R</sup> , Kan <sup>R</sup> ; RS-2 in-frame deletion mutation<br>defective in <i>ΔvgrG-1</i>                                                             | This study                  |
| <i>ΔvgrG-2</i>                         | Rif <sup>R</sup> , Kan <sup>R</sup> ; RS-2 in-frame deletion mutation<br>defective in <i>ΔvgrG-2</i>                                                             | This study                  |
| <i>ΔvgrG-3</i>                         | Rif <sup>R</sup> , Kan <sup>R</sup> ; RS-2 in-frame deletion mutation<br>defective in <i>ΔvgrG-3</i>                                                             | This study                  |
| <i>ΔvgrG-4</i>                         | Rif <sup>R</sup> , Kan <sup>R</sup> ; RS-2 in-frame deletion mutation<br>defective in <i>ΔvgrG-4</i>                                                             | This study                  |
| <i>ΔvgrG-5</i>                         | Rif <sup>R</sup> , Kan <sup>R</sup> ; RS-2 in-frame deletion mutation<br>defective in <i>ΔvgrG-5</i>                                                             | This study                  |
| <i>ΔvgrG-6</i>                         | Rif <sup>R</sup> , Kan <sup>R</sup> ; RS-2 in-frame deletion mutation<br>defective in <i>ΔvgrG-6</i>                                                             | This study                  |
| <i>ΔvgrG-7</i>                         | Rif <sup>R</sup> , Kan <sup>R</sup> ; RS-2 in-frame deletion mutation<br>defective in <i>ΔvgrG-7</i>                                                             | This study                  |
| <i>ΔvgrG-8</i>                         | Rif <sup>R</sup> , Kan <sup>R</sup> ; RS-2 in-frame deletion mutation<br>defective in <i>ΔvgrG-8</i>                                                             | This study                  |
| <b><i>Escherichia coli</i> strains</b> |                                                                                                                                                                  |                             |
| DH5α                                   | F-Φ80d <i>lacZΔM15Δ(lacZYA-argF)</i> U169 <i>recA1endA1, hsdR17(rk-, mk+) phoAsupE44 λ-thi-1 gyrA96relA1</i>                                                     | Invitrogen                  |
| S17-1 <i>λ pir</i>                     | <i>λ</i> Lysogenic S17-1 derivative producing <i>π</i> protein for replication of plasmids carrying <i>oriR6K</i> ; <i>recAprohsdRRP4-2-Tc::Mu-Km::Tn7 λ-pir</i> | Simon et al., 1983          |
| <b>Plasmids</b>                        |                                                                                                                                                                  |                             |
| pJP5603                                | Kan <sup>R</sup> ;R6K-based suicide vector; requires the <i>pir</i> -encoded <i>π</i> protein for replication                                                    | Penfold and Pemberton, 1992 |
| pGEM-T                                 | Amp <sup>R</sup> ; cloning vector                                                                                                                                | Promega                     |
| pRADK                                  | Amp <sup>R</sup> , Chl <sup>R</sup> , Km <sup>R</sup> ; broad host expression vector                                                                             | Gao et al., 2005            |

<sup>a</sup>Amp<sup>R</sup>, Kan<sup>R</sup>, Rif<sup>R</sup>, Chl<sup>R</sup> indicate resistant to Ampicillin-, Kanamycin-, Rifampicin-, Chloramphenicol -, respectively.

**Table S3** List of primers used in this study.

| Primers | Nucleotide sequences (5'-3')          | Characterization                                           |
|---------|---------------------------------------|------------------------------------------------------------|
| pppA-F  | <u>CGCGGATCCAAGCCTGCGTGGACT</u> (B)   | 324 bp internal upstream fragment of <i>pppA</i> ; used    |
| pppA-R  | <u>GGAATTCGCACCTGGA</u> ACTCATTG (E)  | to create $\Delta pppA$                                    |
| clpB-F  | <u>CGGGATCCGGACGAGGGACAGAC</u> (B)    | 339 bp internal upstream fragment of <i>clpB</i> ; used to |
| clpB-R  | <u>CGGAATTCATGTAGCGGTGGGAC</u> (E)    | create $\Delta clpB$                                       |
| hcp-F   | <u>CGGGATCCGACCGACATCCGTTCC</u> (B)   | 235 bp internal upstream fragment of <i>hcp</i> ; used to  |
| hcp-R   | <u>GGAATTCGGTGAGGGTGATCTTGC</u> (E)   | create $\Delta hcp$                                        |
| fHA-F   | <u>CGGGATCCTCAGCCCTGTTTCCA</u> (B)    | 237 bp internal upstream fragment of <i>fHA</i> ; used to  |
| fHA-R   | <u>CGGAATTCCTTTCCTCGCTCTTGC</u> (E)   | create $\Delta fHA$                                        |
| lip-F   | <u>CGGGATCCCAGCAACCTGAACCG</u> (B)    | 192 bp internal upstream fragment of <i>lip</i> ; used to  |
| lip-R   | <u>CGGAATTCGCCTCGTCCTTGTC</u> (E)     | create $\Delta lip$                                        |
| impJ-F  | <u>CGGGATCCAACAGGACCGCTACACC</u> (B)  | 432 bp internal upstream fragment of <i>impJ</i> ; used to |
| impJ-R  | <u>CCGGAATTCGGCTCACCCACCCAT</u> (E)   | create $\Delta impJ$                                       |
| dotU-F  | <u>CGGGATCCGGCATTCCAGCATTAC</u> (B)   | 303 bp internal upstream fragment of <i>dotU</i> ; used to |
| dotU-R  | <u>CGGAATTCAAACCGAGCGTCAGG</u> (E)    | create $\Delta dotU$                                       |
| icmF-F  | <u>CGGGATCCCGGCAACAACCAGAA</u> (B)    | 766 bp internal upstream fragment of <i>icmF</i> ; used to |
| icmF-R  | <u>GGAATTCCTCATGCGAGAAAACG</u> (E)    | create $\Delta icmF$                                       |
| impM-F  | <u>CGGGATCCCGCTGCTATCCGCTCAC</u> (B)  | 278 bp internal upstream fragment of <i>impM</i> ; used    |
| impM-R  | <u>CCGGAATTC AACATCGCCTCGCCAC</u> (E) | to create $\Delta impM$                                    |
| impA-F  | <u>CGGGATCCAGGACGGCGACTACTT</u> (B)   | 355 bp internal upstream fragment of <i>impA</i> ; used    |
| impA-R  | <u>CCGGAATTC TCGTTCAGCACCACC</u> (E)  | to create $\Delta impA$                                    |
| impB-F  | <u>CGGGATCCTGATGGCGGACCTCT</u> (B)    | 147 bp internal upstream fragment of <i>impB</i> ; used    |
| impB-R  | <u>CGGAATTC CCGTCAGCGTGTTGG</u> (E)   | to create $\Delta impB$                                    |
| impC-F  | <u>CGGGATCCGGACCAGAGCCCTAT</u> (B)    | 468 bp internal upstream fragment of <i>impC</i> ; used    |
| impC-R  | <u>CGGAATTC AACGAGCGTTGATG</u> (E)    | to create $\Delta impC$                                    |
| impE-F  | <u>CGGGATCCCTCGGATGGATGGTG</u> (B)    | 292 bp internal upstream fragment of <i>impE</i> ; used    |
| impE-R  | <u>CGGAATTC CGTTCTGGAGCGTGA</u> (E)   | to create $\Delta impE$                                    |
| impF-F  | <u>CGCGGATCCGCCGAAGCGGTCTAT</u> (B)   | 307 bp internal upstream                                   |

|            |                                       |                                                            |
|------------|---------------------------------------|------------------------------------------------------------|
| impF-R     | <u>CGGAATTCGCAGGGTGTGTTGTGGTG</u> (E) | fragment of <i>impF</i> ; used to create $\Delta impF$     |
| dUF879-F   | <u>CGCGGATCCTTTTCGTGCCGTTCTT</u> (B)  | 396 bp internal upstream fragment of <i>dUF879</i> ;       |
| dUF879-R   | <u>GGAATTCGCGAGGTAGTTGAGGG</u> (E)    | used to create $\Delta dUF879$                             |
| impH-F     | <u>CGCGGATCCATCCGCATCCGTTTCG</u> (B)  | 226 bp internal upstream fragment of <i>impH</i> ; used    |
| impH-R     | <u>GGAATTCCTCGTTGGGACCATAGAG</u> (E)  | to create $\Delta impH$                                    |
| clpV-F     | <u>CGGGATCCGCTATGTGGGCTACG</u> (B)    | 526 bp internal upstream fragment of <i>clpV</i> ; used to |
| clpV-R     | <u>CGGAATTCATCGACCGAACTCT</u> (E)     | create $\Delta clpV$                                       |
| vgrG-1-F   | <u>CGGGATCCCCGACCGTGAGAATA</u> (B)    | 564 bp internal upstream fragment of <i>vgrG-1</i> ; used  |
| vgrG-1-R   | <u>CGGAATTCGGGGTTTTGGAGTTT</u> (E)    | to create $\Delta vgrG-1$                                  |
| vgrG-2-F   | <u>CGCGGATCCTCGTGGAAGAGGTTT</u> (B)   | 367 bp internal upstream fragment of <i>vgrG-2</i> ; used  |
| vgrG-2-R   | <u>CGGAATTCGCTTGGCACTGTTGAA</u> (E)   | to create $\Delta vgrG-2$                                  |
| vgrG-3-F   | <u>CGGGATCCACCAGAAGGGGATAGAG</u> (B)  | 424 bp internal upstream fragment of <i>vgrG-3</i> ; used  |
| vgrG-3-R   | <u>CGGAATTCCTTGGGACTGATGAGGCT</u> (E) | to create $\Delta vgrG-3$                                  |
| vgrG-4-F   | <u>CGGGATCCTCGTGGAAGAGGTTTTGA</u> (B) | 574 bp internal upstream fragment of <i>vgrG-4</i> ; used  |
| vgrG-4-R   | <u>CGGAATTCGATGAGGTACTGCTGGTT</u> (E) | to create $\Delta vgrG-4$                                  |
| vgrG-5-F   | <u>CGGGATCCCATCGCCTCTACTCCTAC</u> (B) | 637 bp internal upstream fragment of <i>vgrG-5</i> ; used  |
| vgrG-5-R   | <u>CGGAATTCCTGCTCTTCGTTGTGCTT</u> (E) | to create $\Delta vgrG-5$                                  |
| vgrG-6-F   | <u>CGCGGATCCCGCCTGGGATTACTG</u> (B)   | 593 bp internal upstream fragment of <i>vgrG-6</i> ; used  |
| vgrG-6-R   | <u>CGGAATTCGCTGTTGAACGAGGAA</u> (E)   | to create $\Delta vgrG-6$                                  |
| vgrG-7-F   | <u>CGGGATCCCGCCGAACTGAACAA</u> (B)    | 737 bp internal upstream fragment of <i>vgrG-7</i> ; used  |
| vgrG-7-R   | <u>CGGAATTCGCAGCCCAGGATGAT</u> (E)    | to create $\Delta vgrG-7$                                  |
| vgrG-8-F   | <u>CGGGATCCCAACGACGACTACGAC</u> (B)   | 367 bp internal upstream fragment of <i>vgrG-8</i> ; used  |
| vgrG-8-R   | <u>CCGGAATTCAGAGCCCTCTTCCTG</u> (E)   | to create $\Delta vgrG-8$                                  |
| Aaa-F      | GACCAGCCACACTGG GAC                   | 370 bp <i>A. oryzae</i> RS-2                               |
| Aaa-R      | CTGCCGTA CTCCAGCGAT                   | special primers used to screen <i>A. oryzae</i>            |
| pJP5603-F  | CTGATGCCCGCCGTGTT C                   | 112 bp specific primers of pJP5603 for                     |
| pJP5603-R  | CCAATAGCAGCCAGTCCCT                   | confirming the mutant                                      |
| 16s rDNA-F | AGAGTT TGATCCTGGCTCAG                 | 1000 bp specific primers of bacterial for checking         |
| 16s rDNA-R | GGTTACCTTGT TACGACT T                 |                                                            |

|             |                                                           | the strain sequence                                                    |
|-------------|-----------------------------------------------------------|------------------------------------------------------------------------|
| pppA-comp-F | <u>TGCCATGGTACCCGGGAGCT</u> CGGATGGCG<br>GCATTGAGCG (S)   | 1310 bp fragment using<br>for complementation of<br><i>pppA</i> mutant |
| pppA-comp-R | CGCGTCTGCATGTGGAAGCTTTCAATCGG<br>TACGTAGCAACAATCG(H)      |                                                                        |
| clpB-comp-F | <u>TGCCATGGTACCCGGGAGCT</u> CCCGTAACA<br>GAACCCGACAGC(S)  | 2110 bp fragment using<br>for complementation of<br><i>clpB</i> mutant |
| clpB-comp-R | CGCGTCTGCATGTGGAAGCTTTTACCCCA<br>CAGCCGCCGC(H)            |                                                                        |
| hcp-comp-F  | <u>TGCCATGGTACCCGGGAGCT</u> CCCCTTGGGA<br>ACCCAGGTAGGG(S) | 983 bp fragment using<br>for complementation of<br><i>hcp</i> mutant   |
| hcp-comp-R  | CGCGTCTGCATGTGGAAGCTTTTACATTTC<br>CTTGTTGCCCTTGA(H)       |                                                                        |
| dotU-comp-F | <u>TGCCATGGTACCCGGGAGCT</u> CCGGCCCCGC<br>GGCCATGCCG(S)   | 1853 bp fragment using<br>for complementation of<br><i>dotU</i> mutant |
| dotU-comp-R | CGCGTCTGCATGTGGAAGCTTTTAGTTCTT<br>CGGTGTGCCGG(H)          |                                                                        |
| impJ-comp-F | <u>TGCCATGGTACCCGGGAGCT</u> CGTGCCGCC<br>GGCCGTCTTC(S)    | 1835 bp fragment using<br>for complementation of<br><i>impJ</i> mutant |
| impJ-comp-R | CGCGTCTGCATGTGGAAGCTTTCAGCGCC<br>GTATGGCCCA(H)            |                                                                        |
| icmF-comp-F | <u>TGCCATGGTACCCGGGAGCT</u> CGCCAGTTC<br>CTGGAGCCCCG(S)   | 4133 bp fragment using<br>for complementation of<br><i>icmF</i> mutant |
| icmF-comp-R | CGCGTCTGCATGTGGAAGCTTTCAGAGAT<br>TGCCAGGACACGC(H)         |                                                                        |
| impM-comp-F | <u>TGCCATGGTACCCGGGAGCT</u> CCGCTTCCG<br>CCAGGGTGTC(S)    | 1196 bp fragment using<br>for complementation of<br><i>impM</i> mutant |
| impM-comp-R | CGCGTCTGCATGTGGAAGCTTCTATGCATT<br>CGGGCCTCCG(H)           |                                                                        |

<sup>a</sup> Underlined nucleotides in some of the PCR primers represent restriction sites of enzymes indicated in parentheses (B = *Bam*HI; E = *Eco*RI; S = *Sac*I; H: *Hind*III).



**Table S4** Effect of type VI secretion system on the plant height of *Acidovorax avenae* subsp. *avenae* strain RS-2 to rice seedling.

|  | Strains            | Plant height (cm) | Decrease (%) | Strains        | Plant height (cm) | Decrease (%) |
|--|--------------------|-------------------|--------------|----------------|-------------------|--------------|
|  | ddH <sub>2</sub> O | 5.78 ± 0.10**     | --           | <i>ΔvgrG-7</i> | 3.25 ± 0.21*      | 43.77        |
|  | <i>ΔpppA</i>       | 4.01 ± 0.16**     | 30.62        | <i>ΔvgrG-8</i> | 3.57 ± 0.05*      | 38.24        |
|  | <i>ΔclpB</i>       | 4.41 ± 0.17**     | 23.70        | <i>ΔfHA</i>    | 2.95 ± 0.07       | 48.96        |
|  | <i>Δhcp</i>        | 5.41 ± 0.16**     | 6.40         | <i>ΔdUF879</i> | 2.93 ± 0.32       | 49.31        |
|  | <i>ΔimpJ</i>       | 4.46 ± 0.08**     | 22.84        | <i>ΔimpC</i>   | 3.07 ± 0.79       | 46.89        |
|  | <i>ΔdotU</i>       | 4.09 ± 1.06**     | 29.24        | <i>ΔimpA</i>   | 2.58 ± 0.27       | 55.36        |
|  | <i>ΔicmF</i>       | 4.83 ± 0.20**     | 16.44        | <i>ΔclpV</i>   | 2.95 ± 0.22       | 48.96        |
|  | <i>ΔimpM</i>       | 4.76 ± 0.22**     | 17.65        | <i>ΔimpF</i>   | 2.67 ± 0.23       | 53.81        |
|  | <i>ΔvgrG-1</i>     | 3.49 ± 0.26*      | 39.62        | <i>ΔimpB</i>   | 2.92 ± 0.08       | 49.48        |
|  | <i>ΔvgrG-2</i>     | 3.44 ± 0.14*      | 40.48        | <i>ΔimpE</i>   | 2.41 ± 0.12       | 58.30        |
|  | <i>ΔvgrG-3</i>     | 3.57 ± 0.15*      | 38.24        | <i>Δlip</i>    | 2.86 ± 0.10       | 50.52        |
|  | <i>ΔvgrG-4</i>     | 3.16 ± 0.05*      | 45.33        | <i>ΔimpH</i>   | 3.04 ± 0.12       | 47.40        |
|  | <i>ΔvgrG-5</i>     | 3.57 ± 0.05*      | 38.24        | wild-type      | 2.15 ± 0.08       | 62.80        |
|  | <i>ΔvgrG-6</i>     | 3.53 ± 0.15*      | 38.93        |                |                   |              |

\*\*" 0.01 < *p* < 0.05, significant difference; \*\*\*" *p* < 0.01, very significant difference; not marked with 0.05 < *p*, no significant difference. The wild-type and ddH<sub>2</sub>O were used as the positive and negative control, respectively.
